# Supplementary material for: Matrix Metalloproteinases in Age-Related Macular Degeneration (AMD)
Source: MDPI journal article supplement (doi:10.3390/ijms21165934), 2020-08-18
Supplement: s1 [file s1]

**Supplementary Table S1.** Matrix metalloproteinases classification.

| MMPs Classification        |                          |                          |                                                                                                                                                                                                                                                                                                                                     |                                                                                                                                                                                                                                  |                                                                                                                                                                                      |                                                                                                                                                                                                                                                                                                              |               |
|----------------------------|--------------------------|--------------------------|-------------------------------------------------------------------------------------------------------------------------------------------------------------------------------------------------------------------------------------------------------------------------------------------------------------------------------------|----------------------------------------------------------------------------------------------------------------------------------------------------------------------------------------------------------------------------------|--------------------------------------------------------------------------------------------------------------------------------------------------------------------------------------|--------------------------------------------------------------------------------------------------------------------------------------------------------------------------------------------------------------------------------------------------------------------------------------------------------------|---------------|
| Traditional classification | Numerical classification | Chromosomal localization | Group of sustrates enzymes                                                                                                                                                                                                                                                                                                          | General biological effect                                                                                                                                                                                                        | Reported eye localization                                                                                                                                                            | Eye implicated processes                                                                                                                                                                                                                                                                                     | Ref.          |
| Collagenases               |                          |                          |                                                                                                                                                                                                                                                                                                                                     |                                                                                                                                                                                                                                  |                                                                                                                                                                                      |                                                                                                                                                                                                                                                                                                              |               |
| Collagenase-1              | MMP-1                    | 11q22-q23                | EMC Substrates                                                                                                                                                                                                                                                                                                                      | Mediate normal ECM turnover, migration of keratinocytes, re-epithelialization, cell migration, platelet aggregation, increase in the bioavailability of IGF-1, cell proliferation, pro-inflammatory effect, and PARP1 activation | <ul style="list-style-type: none"> <li>○ Corneal stroma</li> <li>○ Optic nerve head</li> <li>○ Cultured RPE cells</li> <li>○ Trabecular meshwork</li> <li>○ Aqueous humor</li> </ul> | <ul style="list-style-type: none"> <li>- Development of soft drusen- early AMD</li> <li>- The directional shift in the MMP-1/TIMP-1 ratio is associated with increased type I collagen degradation. Potential mechanism contributing to the pathogenesis of exudative AMD</li> </ul>                         | [41,50,54,55] |
|                            |                          |                          | Non-EMC Substrates                                                                                                                                                                                                                                                                                                                  |                                                                                                                                                                                                                                  |                                                                                                                                                                                      | <ul style="list-style-type: none"> <li>- Corneal wound repair</li> <li>- Glaucomatous optic nerve head damage</li> <li>- Epiretinal and subretinal membranes in PVR</li> <li>- Activation of fibroblasts at the head of pterygium</li> <li>- Overexpression is related to poor RB differentiation</li> </ul> |               |
|                            |                          |                          | Pro-MMP-1, Pro-MMP-2, proMMP-9, MCP-1, MCP-3, MCP-4, SDF, Pro-1L- 1 $\beta$ , 1L-1 $\beta$ , IL-8, IGFBP-2, IGFBP-3, Pro-TNF- $\alpha$ , CXCL5, CXCL11 precursor, Casein, C1q, Serum amyloid A protein, $\alpha$ <sub>1</sub> -Proteinase Inhibitor, $\alpha$ <sub>1</sub> -Anti-Chymotrypsin, $\alpha$ <sub>2</sub> -Macroglobulin |                                                                                                                                                                                                                                  |                                                                                                                                                                                      |                                                                                                                                                                                                                                                                                                              |               |
|                            |                          |                          | Collagen (I, II, III, VII, VIII, X), Entactin, Laminin, Gelatin, Elastin, Fibronectin, Aggrecan, Brevican Neurocan, BM-40, Decorin, Vitronectin, Entactin/ Nidogen, Tenascin, Perlecan, CTGF, Link protein, Myelin basic protein, Fibrin, Fibrinogen                                                                                |                                                                                                                                                                                                                                  |                                                                                                                                                                                      |                                                                                                                                                                                                                                                                                                              |               |
| Collagenase-2              | MMP-8                    | 11q21-q22                | EMC Substrates                                                                                                                                                                                                                                                                                                                      | The activation of osteoclasts, the enhancement of collagen affinity, $\beta$ -                                                                                                                                                   | <ul style="list-style-type: none"> <li>○ Corneal stroma</li> <li>○ Tear samples</li> </ul>                                                                                           | <ul style="list-style-type: none"> <li>- Several roles in ocular inflammation and tissue remodeling, including cleavage</li> </ul>                                                                                                                                                                           |               |
|                            |                          |                          | Collagen (I-III, V, VII, VIII, X), Gelatin, Fibronectin, Laminin Subunit Gamma-                                                                                                                                                                                                                                                     |                                                                                                                                                                                                                                  |                                                                                                                                                                                      |                                                                                                                                                                                                                                                                                                              |               |

|               |        |         |                                                                                                                                                                                                                                           |                                                                                                                                                   |                      |                                                                                                                                                                                                       |                  |
|---------------|--------|---------|-------------------------------------------------------------------------------------------------------------------------------------------------------------------------------------------------------------------------------------------|---------------------------------------------------------------------------------------------------------------------------------------------------|----------------------|-------------------------------------------------------------------------------------------------------------------------------------------------------------------------------------------------------|------------------|
|               |        |         | 2, Entactin, Aggrecan, Tenascin, Brevican Core Protein Precursor, Myelin Basic Protein, Fibrinogen                                                                                                                                        | FGF release, anti-inflammatory activity                                                                                                           | ○ Vitreous samples   | degradation ECM components and regulation of cytokine activity                                                                                                                                        | [55,58]          |
|               |        |         | Non-EMC Substrates                                                                                                                                                                                                                        |                                                                                                                                                   |                      | Non-AMD Eye Processes                                                                                                                                                                                 |                  |
|               |        |         | Pro-MMP-8, MCP-1, Pro-TNF- $\alpha$ , IL-8, L-Selectin, IGFBP, CXCL5, CXCL10, CXCL11, Substance P, Angiotensin I, Angiotensin II, Bradykinin, Ephrin- B1, Plasmin C1-Inhibitor, $\alpha$ 1-Proteinase Inhibitor, $\alpha$ 2-Macroglobulin |                                                                                                                                                   |                      | - Xerophthalmia<br>- In RD models low MMP-8 expression may lead to inhibition of RPE apoptosis and proliferation<br>- Uveal Melanocytes may participate remodeling and inflammatory process via MMP-8 | [55,58,59]       |
|               |        |         | EMC Substrates                                                                                                                                                                                                                            |                                                                                                                                                   |                      | Non-AMD Eye Processes                                                                                                                                                                                 |                  |
|               |        |         | Collagen (I-III, VI, VII, IX, X, XIV), Gelatin, Fibronectin, Laminin Subunit Gamma-2, Collagen telopeptides, SDF, Brevican, Fibrillin, Aggrecan, Perlecan, CTGF, Large Tenascin-C, Osteonectin, SPARC, Biglycan, Fibrinogen               | Cell migration, Ability of cleavage interstitial collagens I, II and III, as well as other ECM molecules. Key regulator of choroidal angiogenesis | ○ Corneal epithelium | - MMP-13 produced by bone marrow–derived cells appear to be important in experimental choroidal neovascular membrane formation                                                                        | [55,58,60]       |
|               |        |         | Non-EMC Substrates                                                                                                                                                                                                                        |                                                                                                                                                   |                      | Non-AMD Eye Processes                                                                                                                                                                                 |                  |
|               |        |         | Pro-MMP-9, Pro-MMP-13, MCP-3, SDF, Pro-TNF- $\alpha$ , CXCL5, Factor XII, Casein, C1q, $\alpha$ 1-Anti-Chymotrypsin, $\alpha$ 2-Macroglobulin                                                                                             |                                                                                                                                                   |                      | - Corneal wound healing<br>- Increased expression in experimental RD<br>- The modulation of fibrosis could have implications for the development of PVR                                               | [55,56,58,61,62] |
| Collagenase-3 | MMP-13 | 11q22.3 |                                                                                                                                                                                                                                           |                                                                                                                                                   |                      |                                                                                                                                                                                                       |                  |

- MMP-13 expressed by pterygium tissues may induce collagen II and III remodeling in pterygium stroma (pterygium recurrence)

### Gelatinases

[32,41,51–53,55,58,63–65]

|              |       |       |                                                                                                                                                                                                                                                                                                                                                               |                                                                                                                                                                                                                                                                                                                        |                                                                                                                                                                                   |                                                                                                                                                                                                                                                                                                                             |
|--------------|-------|-------|---------------------------------------------------------------------------------------------------------------------------------------------------------------------------------------------------------------------------------------------------------------------------------------------------------------------------------------------------------------|------------------------------------------------------------------------------------------------------------------------------------------------------------------------------------------------------------------------------------------------------------------------------------------------------------------------|-----------------------------------------------------------------------------------------------------------------------------------------------------------------------------------|-----------------------------------------------------------------------------------------------------------------------------------------------------------------------------------------------------------------------------------------------------------------------------------------------------------------------------|
| Gelatinase A | MMP-2 | 16q13 | EMC Substrates                                                                                                                                                                                                                                                                                                                                                | The growth of axons, cell migration, the differentiation of mesenchymal cell with inflammation phenotype, enhancement of collagen affinity, cell proliferation, migration of epithelial cells, anti-inflammatory, an increase in the bioavailability of TGF- $\beta$ , neuronal apoptosis leading to neurodegeneration | AMD Eye Processes                                                                                                                                                                 |                                                                                                                                                                                                                                                                                                                             |
|              |       |       | Collagen (I, II, III, IV, V, VII, X, XI), Gelatin, Elastin, Fibronectin, Entactin/Nidogen-1, Aggrecan, Decorin, Fibrillin, Fibulin 2, Laminin-5, Tenascin, SPARC, Vitronectin, Galectin-1, Galectin-3, Versican, BM-40, Brevican, Neurocan, CTGF, CSPG-4, Dystroglycan, PCPE-1, Link Protein, Osteonectin, Myelin Basic Protein, Biglycan, Fibrin, Fibrinogen |                                                                                                                                                                                                                                                                                                                        | <ul style="list-style-type: none"><li>○ Cornea (all layers)</li><li>○ Vitreous</li><li>○ Optic nerve head</li><li>○ Interphotoreceptor matrix</li><li>○ Lens epithelium</li></ul> | <ul style="list-style-type: none"><li>- Critical role in the early AMD development, due to the accumulation of deposits under the RPE and increased synthesis of IV type collagen</li><li>-Total levels of active MMP-2 are significantly reduced in BM from AMD patients</li><li>- Increase plasma levels in PCV</li></ul> |
|              |       |       | Non-EMC Substrates                                                                                                                                                                                                                                                                                                                                            |                                                                                                                                                                                                                                                                                                                        | Non-AMD Eye Processes                                                                                                                                                             |                                                                                                                                                                                                                                                                                                                             |
|              |       |       | Pro-MMP-1, Pro-MMP-2, Pro-MMP-13, MMP-12, MCP-3, SDF, Pro-TGF- $\beta$ 1,                                                                                                                                                                                                                                                                                     |                                                                                                                                                                                                                                                                                                                        | <ul style="list-style-type: none"><li>- Corneal wound repair and development</li><li>- Glaucomatous optic nerve head damage</li><li>- Vitreous liquefaction</li></ul>             |                                                                                                                                                                                                                                                                                                                             |

|              |       |               |                                                                                                                                                                                                                                                                                                                                                                                                          |                                                                                                                                                                                                      |                                                                                                                                                                                                            |                                                                                                                                                                                                                                                                                       |                     |
|--------------|-------|---------------|----------------------------------------------------------------------------------------------------------------------------------------------------------------------------------------------------------------------------------------------------------------------------------------------------------------------------------------------------------------------------------------------------------|------------------------------------------------------------------------------------------------------------------------------------------------------------------------------------------------------|------------------------------------------------------------------------------------------------------------------------------------------------------------------------------------------------------------|---------------------------------------------------------------------------------------------------------------------------------------------------------------------------------------------------------------------------------------------------------------------------------------|---------------------|
|              |       |               | Pro-TNF- $\alpha$ , Pro-IL-1 $\beta$ , CXCL5, IGFBP-3, IGFBP-4, IGFBP-5, IGFBP-6, 14-3-3 protein, Big endothelin-1, Cystatin C, Follistatin-like 1, Alpha- actin-2, Pregnancy zone protein, Substance P, Decorin, IGFBP, Plasminogen receptor S100A10, proEMAP/p43, FGF-R1, MMIF, Thrombospondin-2, Plasminogen, $\alpha$ 1-Proteinase Inhibitor, $\alpha$ 1-Anti-Chymotrypsin, $\alpha$ 2-Macroglobulin |                                                                                                                                                                                                      |                                                                                                                                                                                                            | - Cataract formation<br>- Uveitis<br>- PDR and new blood vessels formation<br>- MMP-2 inhibition may reduce VEGF expression and, thus, angiogenesis in retinoblastoma cell lines (Overexpression is related to poor RB differentiation)                                               | [55,57,58,63–65]    |
|              |       |               | EMC Substrates                                                                                                                                                                                                                                                                                                                                                                                           | AMD Eye Processes                                                                                                                                                                                    |                                                                                                                                                                                                            |                                                                                                                                                                                                                                                                                       |                     |
| Gelatinase B | MMP-9 | 20q11.2-q13.1 | Collagen (I, IV, V, XI, and XIV), Gelatin, Elastin, Vitronectin, Laminin, Decorin, Fibrillin, Fibronectin, SPARC, Aggrecan, Link Protein, Galectin-1, Galectin-3, Versican, Decorin, Biglycan, Link Protein, Osteonectin, Myelin Basic Protein, Fibrin, Fibrinogen                                                                                                                                       | Collagen affinity enhancing, pro-inflammatory and anti-inflammatory activity, tumor cell resistance, IL-2 response reduction, hypertrophic chondrocyte apoptosis and the subsequent incorporation of | <ul style="list-style-type: none"> <li>○ Corneal epithelium and stroma</li> <li>○ Lens epithelium</li> <li>○ Retinal ganglion cells</li> <li>○ Iris</li> <li>○ Ciliary body</li> <li>○ vitreous</li> </ul> | <ul style="list-style-type: none"> <li>- Increased plasma levels in GA in AMD</li> <li>- Development of CNV as part of AMD pathogenesis</li> <li>- Increase plasma levels in PCV</li> <li>- Total levels of active MMP-9 are significantly reduced in BM from AMD patients</li> </ul> | [32,41,51–53,55,58] |
|              |       |               | Non-EMC Substrates                                                                                                                                                                                                                                                                                                                                                                                       | new units of functional osteoblasts                                                                                                                                                                  |                                                                                                                                                                                                            | Non-AMD Eye Processes                                                                                                                                                                                                                                                                 |                     |
|              |       |               | Pro-MMP-2, Pro-MMP-9, Pro-MMP-13, MCP-3, SDF, Pro-IL-8, Pro-TNF- $\alpha$ , Pro-TGF- $\beta$ 2, Pro-IL-1 $\beta$ , Cell-surface IL-2R $\alpha$ , CXCL5,                                                                                                                                                                                                                                                  |                                                                                                                                                                                                      |                                                                                                                                                                                                            | <ul style="list-style-type: none"> <li>- Corneal ulcerations and neovascularization</li> <li>- Vitreous liquefaction</li> <li>- Cataract formation</li> <li>- Uveitis</li> </ul>                                                                                                      |                     |

|                     |       |       |                                                                                                                                                                                                                                                                                                                                                                                                                                                          |                                                                                                                                                                                                                                                                                                             |                                                                                                                                                                                                                                                                                                                                                                                                                                                                                                                                                                                                        |                  |
|---------------------|-------|-------|----------------------------------------------------------------------------------------------------------------------------------------------------------------------------------------------------------------------------------------------------------------------------------------------------------------------------------------------------------------------------------------------------------------------------------------------------------|-------------------------------------------------------------------------------------------------------------------------------------------------------------------------------------------------------------------------------------------------------------------------------------------------------------|--------------------------------------------------------------------------------------------------------------------------------------------------------------------------------------------------------------------------------------------------------------------------------------------------------------------------------------------------------------------------------------------------------------------------------------------------------------------------------------------------------------------------------------------------------------------------------------------------------|------------------|
|                     |       |       | <p>CXCL9, CXCL10, CXCL11, FGF-R1, CTAP-III/NAP-2, GRO<math>\alpha</math>, PF-4, Integrin beta-2, IGFBP- 1, IGFBP-4, Substance P, Angiotensin I, Angiotensin II, ADAMTS-4, SERPINE2, Casein, C1q, TFPI, Plasminogen, <math>\alpha</math>1-Proteinase Inhibitor, <math>\alpha</math>2-Macroglobulin</p>                                                                                                                                                    |                                                                                                                                                                                                                                                                                                             | <p>- PDR and new blood vessels. An up regulation is associated with CNV. Might be involved in hemorrhagic transformation in patients affected with PDR. Accelerate apoptosis of retinal capillary cells.</p> <p>- MMP-9 inhibition may reduce VEGF expression and, thus, angiogenesis in retinoblastoma cell lines (Overexpression is related to poor RB differentiation)</p> <p>- 17<math>\beta</math>-estradiol upregulates MMP-9 in the lacrimal gland and conjunctival epithelium, increasing activity in tears of dry subjects</p> <p>- Is linked to and contributes to rod death in RP model</p> | [55,57,58,63–66] |
| <b>Stromelysins</b> |       |       |                                                                                                                                                                                                                                                                                                                                                                                                                                                          |                                                                                                                                                                                                                                                                                                             |                                                                                                                                                                                                                                                                                                                                                                                                                                                                                                                                                                                                        |                  |
|                     |       |       | <p>EMC Substrates</p> <p>Collagen (III, IV, V, VII, IX, X, XI), Gelatin, Collagen Telopeptides, Elastin, Fibronectin, Vitronectin, Laminin, Entactin/ Nidogen-1, Tenascin, SPARC, Aggrecan, Decorin, Perlecan, Versican, Fibulin, Biglycan, Link Protein, Osteonectin, Myelin Basic Protein, Fibulin-2, Fibrin, Fibrinogen</p> <p>Non-EMC Substrates</p> <p>Pro-MMP-1, Pro-MMP-3, Pro-MMP-7, Pro-MMP-8, Pro-MMP-9, Pro-MMP- 13, MCP-1, MCP-2, MCP-3,</p> | <p>Migration of cells, epithelial cells apoptosis, the formation of epithelial bubbles, epithelial–mesenchymal conversion, angiostatin-like elements generation, the collagen affinity enhancement, release of bFGF, increase in the bioavailability of IGF-1, cell proliferation, pro-inflammatory and</p> | <p>AMD Eye Processes</p> <p>-The directional shift in the MMP-3/TIMP-1 ratio is associated with increased type I collagen degradation. This may be an important mechanism contributing to the pathogenesis of early exudative AMD</p> <p>Non-AMD Eye Processes</p> <p>- Autocrine regulation of stromal collagenase in penetrating wounds</p> <p>- Glaucomatous optic nerve head damage</p> <p>- DR</p>                                                                                                                                                                                                | [41,55,58]       |
| Stromelysin-1       | MMP-3 | 11q23 |                                                                                                                                                                                                                                                                                                                                                                                                                                                          | <p>○ Corneal stroma</p> <p>○ Optic nerve head</p>                                                                                                                                                                                                                                                           |                                                                                                                                                                                                                                                                                                                                                                                                                                                                                                                                                                                                        |                  |

|               |        |             |                                                                                                                                                                                                                                                                                                                                                                          |                                                                                                                                                                                                                            |                         |                                                                                                                                                                                                                                         |            |
|---------------|--------|-------------|--------------------------------------------------------------------------------------------------------------------------------------------------------------------------------------------------------------------------------------------------------------------------------------------------------------------------------------------------------------------------|----------------------------------------------------------------------------------------------------------------------------------------------------------------------------------------------------------------------------|-------------------------|-----------------------------------------------------------------------------------------------------------------------------------------------------------------------------------------------------------------------------------------|------------|
|               |        |             | MCP-4, SDF, Pro-TNF- $\alpha$ ,<br>L-selectin, Pro-HB-EGF,<br>Pro-IL-1 $\beta$ , Perlecan,<br>Decorin, E-cadherin,<br>IGFBP-3, Cm-Tf, Substance<br>P, T-kininogen, Casein,<br>C1q, uPA, uPAR,<br>Osteopontin, VEGFA, PAI,<br>Plasminogen, $\alpha$ 2-<br>Antiplasmin, $\alpha$ 1-Proteinase<br>Inhibitor, $\alpha$ 1-Anti-<br>Chymotrypsin, $\alpha$ 2-<br>Macroglobulin | anti-inflammatory<br>activity, increase the<br>bioavailability of<br>TGF- $\beta$ , disorder in<br>cells aggregation,<br>increase in cell<br>invasiveness;<br>release of VEGF and<br>bFGF, upregulation<br>of angiogenesis |                         | - MMP-3 deficiency reduces leukocyte<br>recruitment to the retina and vitreous cavity<br>- Strong modulator of acute ocular<br>inflammation in the posterior part of the eye<br>- Activation of fibroblasts at the head of<br>pterygium |            |
|               |        |             | EMC Substrates                                                                                                                                                                                                                                                                                                                                                           |                                                                                                                                                                                                                            |                         | Non-AMD Eye Processes                                                                                                                                                                                                                   |            |
| Stromelysin-2 | MMP-10 | 11q22.3-q23 | Collagen (I, III, IV, V),<br>Gelatin, Elastin,<br>Fibronectin, Aggrecan,<br>Brevican Hyaluronan and<br>Proteoglycan Link Protein<br>1, Proteoglycan, Link<br>Protein, Fibrinogen                                                                                                                                                                                         | Generation of<br>tumstatin,<br>endostatin,<br>angiostatin, and<br>endorepellin                                                                                                                                             | ○ Corneal<br>epithelium | - Ocular surface diseases<br>- Overexpression in diabetic corneas<br>- Vitrectomy could be associated higher<br>concentrations of MMP-10<br>- PDR                                                                                       | [55,68,69] |
|               |        |             | Non-EMC Substrates                                                                                                                                                                                                                                                                                                                                                       |                                                                                                                                                                                                                            |                         |                                                                                                                                                                                                                                         |            |
|               |        |             | Pro-MMP-1, Pro-MMP-7,<br>Pro-MMP-8, Pro-MMP-9,<br>Pro-MMP-10, Casein                                                                                                                                                                                                                                                                                                     |                                                                                                                                                                                                                            |                         |                                                                                                                                                                                                                                         |            |
|               |        |             | EMC Substrates                                                                                                                                                                                                                                                                                                                                                           |                                                                                                                                                                                                                            |                         |                                                                                                                                                                                                                                         |            |
|               |        |             | Gelatin, Fibronectin,<br>Collagen IV, Laminin,<br>Aggrecan                                                                                                                                                                                                                                                                                                               | The enzyme is<br>activated<br>intracellularly by<br>furin within the<br>constitutive<br>secretory pathway.<br>Also, in contrast to<br>other MMP's, this<br>enzyme cleaves                                                  | ○ N/A                   | - N/A                                                                                                                                                                                                                                   | [55]       |
| Stromelysin-3 | MMP-11 | 22q11.2     | Pro-MMP-11, IGFBP-1,<br>Casein, Cm-Tf, $\alpha$ -actin-2,<br>PAI-2, $\alpha$ 2-Antiplasmin, $\alpha$ 1-                                                                                                                                                                                                                                                                  |                                                                                                                                                                                                                            |                         |                                                                                                                                                                                                                                         |            |

|                 |        |               |                                                                                                                                                                                                                                                                                                                                        |                                                                                                                                                                                                                                                                                                                                                       |                                 |                                                                                                                                                                                                                |               |
|-----------------|--------|---------------|----------------------------------------------------------------------------------------------------------------------------------------------------------------------------------------------------------------------------------------------------------------------------------------------------------------------------------------|-------------------------------------------------------------------------------------------------------------------------------------------------------------------------------------------------------------------------------------------------------------------------------------------------------------------------------------------------------|---------------------------------|----------------------------------------------------------------------------------------------------------------------------------------------------------------------------------------------------------------|---------------|
|                 |        |               | Proteinase Inhibitor, $\alpha$ 2-Macroglobulin                                                                                                                                                                                                                                                                                         | alpha 1-proteinase inhibitor but weakly degrades structural proteins of the ECM                                                                                                                                                                                                                                                                       |                                 |                                                                                                                                                                                                                |               |
|                 |        |               | EMC Substrates                                                                                                                                                                                                                                                                                                                         |                                                                                                                                                                                                                                                                                                                                                       |                                 | AMD Eye Processes                                                                                                                                                                                              |               |
|                 |        |               | Collagen (IV, V, IX, X, XI), Gelatin, Elastin, Fibronectin, Vitronectin, Laminin, Entactin/ Nidogen-1, Tenascin, SPARC, Aggrecan, Brevican, Galectin-3, Link Protein, Decorin, Fibulin, Versican, Osteonectin, Myelin Basic Protein, Fibrin, Fibrinogen                                                                                | Adipocyte differentiation, collagen affinity enhancement, an increase in the bioavailability of IGF 1 and TGF- $\beta$ , cell differentiation, abnormal cell aggregation and increase in cells invasiveness, apoptosis induced by Fas receptor activation, the effect of pro-inflammatory activation of osteoclasts, vasoconstriction and cell growth |                                 | - Ability to digest ECM components and cells surface molecules BLD associated with the development of choroidal neovascularization secondary to AMD                                                            | [41,55,58]    |
|                 |        |               | Non-EMC Substrates                                                                                                                                                                                                                                                                                                                     |                                                                                                                                                                                                                                                                                                                                                       |                                 | Non-AMD Eye Processes                                                                                                                                                                                          |               |
| Matrilysin      | MMP-7  | 11q21-q22     | Pro-MMP-1, Pro-MMP-2, Pro-MMP-7, Pro-MMP-9, Pro-TNF- $\alpha$ , Pro- $\alpha$ -defensin, Cell surface bound Fas-L, CXCL9, CXCL11, IGFBP-1, IGFBP-2, IGFBP-3, $\beta$ 4-integrin, E-cadherin, Apo-A1, Apo-CII, CD95-L, Casein, Cm-Tf, Osteopontin, uPA, Plasminogen, Decorin, $\alpha$ 1-Proteinase Inhibitor, $\alpha$ 2-Macroglobulin |                                                                                                                                                                                                                                                                                                                                                       | o Corneal epithelium and stroma | - Corneal wound healing<br>- Human pterygia (angiogenesis)<br>- Increase levels after anti-VEGF in retinal vein occlusion<br>- Elastic fibre degradation in patients with involutional ectropion and entropion | [41,55,70,71] |
|                 |        |               | EMC Substrates                                                                                                                                                                                                                                                                                                                         |                                                                                                                                                                                                                                                                                                                                                       |                                 | Non-AMD Eye Processes                                                                                                                                                                                          |               |
| Metalloelastase | MMP-12 | 11q22.2-q22.3 | Collagen (I, V, And IV), Gelatin, Elastin,                                                                                                                                                                                                                                                                                             | May be involved in tissue injury and remodeling. Has                                                                                                                                                                                                                                                                                                  | o Corneal epithelium            | - Increased expression in RD<br>- Corneal wound healing                                                                                                                                                        | [41,55,61,72] |

|                                    |        |           |                                                                                                                                                                                                                                                                                                                              |                                                                                                           |                                                        |                                                                                                                                                                                                                                                                                                                                                        |                      |
|------------------------------------|--------|-----------|------------------------------------------------------------------------------------------------------------------------------------------------------------------------------------------------------------------------------------------------------------------------------------------------------------------------------|-----------------------------------------------------------------------------------------------------------|--------------------------------------------------------|--------------------------------------------------------------------------------------------------------------------------------------------------------------------------------------------------------------------------------------------------------------------------------------------------------------------------------------------------------|----------------------|
|                                    |        |           | Fibronectin, Vitronectin,<br>Laminin, Entactin,<br>Osteonectin, Decorin,<br>Aggrecan, Biglycan,<br>Fibrillin, Myelin Basic<br>Protein, Fibrin, Fibrinogen<br>Non-EMC Substrates<br>Plasminogen, Pro-TNF- $\alpha$ ,<br>ApoA-1, CXCL9, CXCL10,<br>CXCL11, uPAR, vWF,<br>Factor XII, TFPI, $\alpha$ 1-<br>Proteinase Inhibitor | significant<br>elastolytic activity                                                                       |                                                        | - May be involved in the ECM remodeling<br>- Kew regulator of macrophage infiltration and<br>inflammation, contributing to retinal vascular<br>dysfunction and pathological angiogenesis. The<br>increase or decrease of its levels facilitates CNV<br>formation<br>- The modulation of fibrosis could have<br>implications for the development of PVR |                      |
|                                    |        |           | EMC Substrates                                                                                                                                                                                                                                                                                                               |                                                                                                           |                                                        | Non-AMD Eye Processes                                                                                                                                                                                                                                                                                                                                  |                      |
|                                    |        |           | Collagen IV, Gelatin,<br>Fibronectin, Vitronectin,<br>Fibrinogen                                                                                                                                                                                                                                                             | Ability to digest<br>ECM components                                                                       | ○ epithelial<br>conjunctiva cells                      | - Expression in glioma is correlated with poor<br>clinical outcome                                                                                                                                                                                                                                                                                     | [55]                 |
| Matrilysin-2                       | MMP-26 | 11p15     | Non-EMC Substrates<br>Pro-MMP-9, Pro-MMP26,<br>IGFBP-1, $\alpha$ 1-Proteinase<br>Inhibitor, $\alpha$ 2-<br>Macroglobulin                                                                                                                                                                                                     |                                                                                                           |                                                        |                                                                                                                                                                                                                                                                                                                                                        |                      |
|                                    |        |           | EMC Substrates                                                                                                                                                                                                                                                                                                               |                                                                                                           |                                                        | AMD Eye Processes                                                                                                                                                                                                                                                                                                                                      |                      |
|                                    |        |           | Collagen XVIII,<br>Amelogenin,<br>Ameloblastin, Aggrecan,<br>Laminin, COMP                                                                                                                                                                                                                                                   | May play a central<br>role in tooth enamel<br>formation                                                   | ○ N/A                                                  | - Not associated with the appearance of<br>exudative AMD, but it could affect the size of<br>the neovascular lesion                                                                                                                                                                                                                                    | [38]                 |
|                                    |        |           | Non-EMC Substrates<br>Pro-MMP-20 (autolysis)                                                                                                                                                                                                                                                                                 |                                                                                                           |                                                        |                                                                                                                                                                                                                                                                                                                                                        |                      |
| <b>Membrane-type MMPs (MT-MMP)</b> |        |           |                                                                                                                                                                                                                                                                                                                              |                                                                                                           |                                                        |                                                                                                                                                                                                                                                                                                                                                        |                      |
|                                    |        |           | EMC Substrates                                                                                                                                                                                                                                                                                                               | Anti-inflammatory,<br>cell migration, the<br>formation of renal<br>tubules, epithelial<br>cell migration, | ○ Corneal<br>epithelium<br>○ Human<br>TM cell culture, | Non-AMD Eye Processes                                                                                                                                                                                                                                                                                                                                  |                      |
| MT-MMP-1                           | MMP-14 | 14q11-q12 | Collagen (I, II and III),<br>Gelatin, Fibronectin,<br>Tenascin, Vitronectin,<br>Laminin, Entactin,                                                                                                                                                                                                                           |                                                                                                           |                                                        | - Corneal infection, wound healing, inducing<br>corneal neovascularization (pro-angiogenic<br>factor)<br>- Proliferative diabetic retinopathy                                                                                                                                                                                                          | [41,49,55,61,7<br>2] |

|          |        |           |                                                                                                                                                                                                                                                                                                |                                                                                                                 |                                                            |                                                                                                          |            |
|----------|--------|-----------|------------------------------------------------------------------------------------------------------------------------------------------------------------------------------------------------------------------------------------------------------------------------------------------------|-----------------------------------------------------------------------------------------------------------------|------------------------------------------------------------|----------------------------------------------------------------------------------------------------------|------------|
|          |        |           | Galectin-3, CTGF-L,<br>Fibrillin, Aggrecan,<br>Perlecan, Syndecan-1,<br>Lumican, Myelin Basic<br>Protein, Fibrinogen                                                                                                                                                                           | adhesion reduction,<br>flattening of the<br>cells reduction,<br>trailers embryo to<br>the uterine<br>epithelium | human TM<br>explant culture                                | - Implications for ECM turnover<br>- Biomarker of angiogenic activity in PDR<br>- Keratinocyte migration |            |
|          |        |           | Non-EMC Substrates<br>Pro-MMP-2, Pro-MMP-13,<br>Pro-MMP-14, MMP-14,<br>MCP-3, SDF, Cell-surface<br>CD44, RANKL, tTG, Pro-<br>TNF- $\alpha$ , IL-8, HB-EGF,<br>Factor XII, Pro- $\alpha$ v integrin<br>chain, Apo-CII, Apo-E, $\alpha$ 1-<br>Proteinase Inhibitor, $\alpha$ 2-<br>Macroglobulin | - Activation MMP-2                                                                                              |                                                            |                                                                                                          |            |
|          |        |           | EMC Substrates                                                                                                                                                                                                                                                                                 |                                                                                                                 |                                                            | Non-AMD Eye Processes                                                                                    |            |
| MT-MMP-2 | MMP-15 | 15q13-q21 | Fibronectin, Tenascin,<br>Entactin, Laminin,<br>Aggrecan, Perlecan,<br>Proteoglycan, Myelin Basic<br>Protein                                                                                                                                                                                   | Adhesion and cell<br>flattering reduction                                                                       | ○ Human<br>TM cell culture,<br>human TM<br>explant culture | -Could play a modulatory role in IOP<br>homeostasis                                                      | [55,73,74] |
|          |        |           | Non-EMC Substrates<br>Pro-MMP-2, Cell-<br>surface bound<br>tTG, Pro-TNF- $\alpha$                                                                                                                                                                                                              |                                                                                                                 |                                                            |                                                                                                          |            |
|          |        |           | EMC Substrates                                                                                                                                                                                                                                                                                 |                                                                                                                 |                                                            | Non-AMD Eye Processes                                                                                    |            |
| MT-MMP-3 | MMP-16 | 8q21      | Collagen III, Gelatin,<br>Fibronectin, Vitronectin,<br>Laminin, Myelin Basic<br>Protein                                                                                                                                                                                                        | Adhesion and cell<br>flattering reduction                                                                       | ○ Human<br>TM cell culture,<br>human TM<br>explant culture | -Could play a modulatory role in IOP<br>homeostasis                                                      | [55,73,74] |
|          |        |           | Non-EMC Substrates<br>Pro-MMP-2, Cell-surface<br>bound tTG, Pro-TNF- $\alpha$ ,                                                                                                                                                                                                                |                                                                                                                 |                                                            |                                                                                                          |            |

|                                                       |        |         |                                                                                         |                                                                                                                                                                              |                                                                                                     |                                                                                                                                                                                                                                                                           |
|-------------------------------------------------------|--------|---------|-----------------------------------------------------------------------------------------|------------------------------------------------------------------------------------------------------------------------------------------------------------------------------|-----------------------------------------------------------------------------------------------------|---------------------------------------------------------------------------------------------------------------------------------------------------------------------------------------------------------------------------------------------------------------------------|
|                                                       |        |         | Metastasis-suppressor<br>KiSS-1                                                         |                                                                                                                                                                              |                                                                                                     |                                                                                                                                                                                                                                                                           |
| MT-MMP-4                                              | MMP-17 | 12q24.3 | EMC Substrates                                                                          | May be involved in the activation of membrane-bound precursors of growth factors or inflammatory mediators, such as TNF- $\alpha$ . May also be involved in tumoral process. | Human TM cell culture, human TM explant culture                                                     | Non-AMD Eye Processes                                                                                                                                                                                                                                                     |
|                                                       |        |         | Gelatin, Fibrin, Fibrinogen, Myelin Basic Protein                                       |                                                                                                                                                                              |                                                                                                     | -Could play a modulatory role in IOP homeostasis                                                                                                                                                                                                                          |
|                                                       |        |         | Non-EMC Substrates                                                                      |                                                                                                                                                                              |                                                                                                     |                                                                                                                                                                                                                                                                           |
|                                                       |        |         | Pro-MMP-2, Pro-TNF- $\alpha$ , HB-EGF, ADAMTS4 Peptidase                                |                                                                                                                                                                              |                                                                                                     | [55,73,74]                                                                                                                                                                                                                                                                |
|                                                       |        |         |                                                                                         |                                                                                                                                                                              |                                                                                                     |                                                                                                                                                                                                                                                                           |
| MT-MMP-5                                              | MMP-24 | 20q11.2 | EMC Substrates                                                                          | Involved in cell-cell interactions between nociceptive neurites and mast cells. May play a role in axonal growth                                                             | Human TM cell culture, human TM explant culture                                                     | Non-AMD Eye Processes                                                                                                                                                                                                                                                     |
|                                                       |        |         | Fibronectin, Gelatin, Chondroitin Sulphate Proteoglycan, Dermatan Sulphate Proteoglycan |                                                                                                                                                                              |                                                                                                     | -Could play a modulatory role in IOP homeostasis                                                                                                                                                                                                                          |
|                                                       |        |         | Non-EMC Substrates                                                                      |                                                                                                                                                                              |                                                                                                     |                                                                                                                                                                                                                                                                           |
|                                                       |        |         | Pro-MMP-2, KiSS-1                                                                       |                                                                                                                                                                              |                                                                                                     | [55,73,74]                                                                                                                                                                                                                                                                |
| <b>Tissue inhibitor of metalloproteinases (TIMPs)</b> |        |         |                                                                                         |                                                                                                                                                                              |                                                                                                     |                                                                                                                                                                                                                                                                           |
| Metalloprotei<br>nase inhibitor<br>1                  | TIMP-1 | Xp11.3  | All types of MMPs (MMP-1, MMP-3, MMP-7 and MMP-9) and MT-MMPs                           | Connective tissue cells, macrophages Increased expression has been found associated with worse prognosis of tumors such as laryngeal carcinoma or melanoma                   | Corneal epithelium and endothelium<br>Optic nerve head<br>Retinal ganglion cells<br>Vitreous<br>IPM | AMD Eye Processes                                                                                                                                                                                                                                                         |
|                                                       |        |         |                                                                                         |                                                                                                                                                                              |                                                                                                     | - Potential role for MMPs in the development of CNV in AMD. TIMP-1 promotes VEGF-induced neovascularization in the retina<br>- Increase levels in patients with GA in AMD<br>- Lower TIMP-3 levels are associated with higher TIMP-1 levels and the presence of GA in AMD |
|                                                       |        |         |                                                                                         |                                                                                                                                                                              |                                                                                                     | Non-AMD Eye Processes                                                                                                                                                                                                                                                     |
|                                                       |        |         |                                                                                         |                                                                                                                                                                              |                                                                                                     | -Increased expression in experimental RD and PVR                                                                                                                                                                                                                          |
|                                                       |        |         |                                                                                         |                                                                                                                                                                              |                                                                                                     | [16,17,51,52]                                                                                                                                                                                                                                                             |
|                                                       |        |         |                                                                                         |                                                                                                                                                                              |                                                                                                     | [61,72,75,76]                                                                                                                                                                                                                                                             |

|                                      |        |         |                                      |                                                                                                                                                                                                                |                                                                                                                                                      |                                                                                                                                                                                                                                                                                                                                                                       |               |  |
|--------------------------------------|--------|---------|--------------------------------------|----------------------------------------------------------------------------------------------------------------------------------------------------------------------------------------------------------------|------------------------------------------------------------------------------------------------------------------------------------------------------|-----------------------------------------------------------------------------------------------------------------------------------------------------------------------------------------------------------------------------------------------------------------------------------------------------------------------------------------------------------------------|---------------|--|
|                                      |        |         |                                      |                                                                                                                                                                                                                |                                                                                                                                                      | - Corneal wound healing, keratoconus<br>- POAG                                                                                                                                                                                                                                                                                                                        |               |  |
|                                      |        |         |                                      |                                                                                                                                                                                                                |                                                                                                                                                      | AMD Eye Processes                                                                                                                                                                                                                                                                                                                                                     |               |  |
| Metalloprotei<br>nase inhibitor<br>2 | TIMP-2 | 17q25.3 | All types of MMPs (MMP-2)            | Connective tissue cells, macrophages<br>Important role in hippocampus and cognitive function<br>It has an independent antiangiogenic effect                                                                    | <ul style="list-style-type: none"><li>○ Corneal epithelium</li><li>○ RPE</li><li>○ Retinal ganglion cells</li><li>○ IPM</li><li>○ Vitreous</li></ul> | - In combination with MMP-14, is involved in regulation of MMP-2. High levels of TIMP-2 inhibit MMP-2 activity- Potential role in AMD                                                                                                                                                                                                                                 | [16,17,51,52] |  |
|                                      |        |         |                                      |                                                                                                                                                                                                                |                                                                                                                                                      | Non-AMD Eye Processes                                                                                                                                                                                                                                                                                                                                                 |               |  |
|                                      |        |         |                                      |                                                                                                                                                                                                                |                                                                                                                                                      | - Potential Biomarkers of RB progression<br>- Increased expression in experimental RD and PVR<br>- Corneal wound healing, keratoconus<br>- POAG                                                                                                                                                                                                                       | [57,61,72]    |  |
|                                      |        |         |                                      |                                                                                                                                                                                                                |                                                                                                                                                      | AMD Eye Processes                                                                                                                                                                                                                                                                                                                                                     |               |  |
| Metalloprotei<br>nase inhibitor<br>3 | TIMP-3 | 22q12.3 | All types of MMPs<br>ADAM<br>ADAMTS  | Blocks the development of neovascularization by inhibiting the binding of VEGF to the VEGF receptor, Regulate local MMP to maintain rate of turnover and limit choroidal growth<br>Fibroblasts, synovial cells | <ul style="list-style-type: none"><li>○ RPE</li><li>○ BM</li><li>○ Corneal epithelium</li><li>○ Vitreous</li><li>○ IPM</li></ul>                     | - Excess TIMP-3, may retard BM renewal and result in the thickening.<br>- Reduced TIMP-3 production, causes an increase in the amounts of various collagens and development of early dry AMD.<br>Also increases ADAM/ADAMTs, which can be implicated in CNV formation in AMD<br>-Mutations in this gene have been associated with the autosomal dominant disorder SFD | [16,17,51,52] |  |
|                                      |        |         |                                      |                                                                                                                                                                                                                |                                                                                                                                                      | Non-AMD Eye Processes                                                                                                                                                                                                                                                                                                                                                 |               |  |
|                                      |        |         |                                      |                                                                                                                                                                                                                |                                                                                                                                                      | - Potential role in RP                                                                                                                                                                                                                                                                                                                                                | [17,77]       |  |
|                                      |        |         |                                      |                                                                                                                                                                                                                |                                                                                                                                                      | Non-AMD Eye Processes                                                                                                                                                                                                                                                                                                                                                 |               |  |
| Metalloprotei<br>nase inhibitor<br>4 | TIMP-4 | 3p25.2  | MMP-1, MMP-2, MMP-3, MMP-7 and MMP-9 | Role in the regulation of platelet aggregation, hormonal and                                                                                                                                                   | <ul style="list-style-type: none"><li>○ Aqueous humor</li></ul>                                                                                      | - POAG                                                                                                                                                                                                                                                                                                                                                                | [76]          |  |

---

endometrial tissue  
remodeling

---

Ref: references. MMP-1: matrix metalloproteinase 1; BM-40: basement-membrane protein 40; CTGF: CCN2 or connective tissue growth factor ; ECM: extracellular matrix ; IGF-1: insulin-like growth factor 1; MCP-1: Monocyte chemoattractant protein-1; SDF: stromal cell derived factor ; AMD: age-related macular degeneration; RPE: retinal pigment epithelium; IGFBP: insulin like growth factor binding protein; CXCL11 precursor: C-X-C motif chemokine 11; PARP1: Poly [ADP-ribose] polymerase 1; TNF- $\alpha$  : Tumor necrosis factor alpha; TIMP-1: metalloproteinase tissue inhibitor 1 ; RB: retinoblastoma; MMP-8: matrix metalloproteinase 8;  $\beta$ -FGF: basic fibroblast growth factor; RD: retinal detachment; MMP-13: matrix metalloproteinase 13; SPARC: Secreted protein acidic and rich in cysteine; PVR: proliferative vitreoretinopathy; MMP-2: matrix metalloproteinase 2; CSPG-4: chondroitin sulfate proteoglycan 4; PCPE-1: procollagen c-proteinase enhancer 1; PCV: polypoidal choroidal vasculopathy; PDR: proliferative diabetic retinopathy ; VEGF: vascular endothelial growth factor; proEMAP/p43: tumour-derived cytokine; FGF-R1: fibroblast growth factor receptor 1; MMIF: macrophage migration inhibitory factor; TGF- $\beta$ : transforming growth factor beta; MMP-9: matrix metalloproteinase 9; IL: interleukin; FGF-R1: fibroblast growth factor receptor 1; CTAP-III/NAP-2: connective tissue-activating peptide III/neutrophil-activating peptide-2; GRO $\alpha$ : growth-regulated oncogene alpha; PF-4: platelet factor 4; ADAMTS-4: a disintegrin and metalloproteinase with thrombospondin motifs; SERPINE2: serpin family E member 2; TFPI: tissue factor pathway inhibitor; CNV: choroidal neovascularization; GA: geographic atrophy; RP: retinitis pigmentosa; MMP-3:matrix metalloproteinase 3; Pro-HB-EGF: heparin-binding epidermal growth factor-like growth factor; Cm-Tf: carboxymethylated transferrin; uPA: urokinase plasminogen activator; uPAR: urokinase plasminogen activator receptor ; MMP-10: matrix metalloproteinase 10; MMP-11: matrix metalloproteinase 11; N/A: not available; PAI-2: plasminogen activator inhibitor-2; MMP-7: matrix metalloproteinase 7; BLD: basal laminar and linear deposits; Fas-L: Fas ligand; Apo-A1: apolipoprotein A1; Apo-CII: apolipoprotein C-2;CD95-L: cluster of differentiation-95 ligand; MMP-12: matrix metalloproteinase 12; vWF: von Willebrand factor; MMP-26: matrix metalloproteinase 26; MMP-20: matrix metalloproteinase 20; COMP: cartilage oligomeric matrix protein; MMP-14: matrix metalloproteinase 14; CTGF-L: connective tissue growth factor-like; RANKL: receptor activator of nuclear factor kappa-B ligand; tTG: tissue transglutaminase; TM: trabecular meshwork; MMP-15: matrix metalloproteinase 15; IOP: intraocular pressure; MMP-16: matrix metalloproteinase 16; Metastasis-suppressor KiSS-1: metastasis-suppressor kisspeptin 1; MMP-17: matrix metalloproteinase 17; MMP-24: matrix metalloproteinase 24; IPM: interphotoreceptor matrix; ADAM: a disintegrin and metalloproteinase; ADAMTS: A Disintegrin-like And Metalloproteinase with Thrombospondin motifs; TIMP-2: metalloproteinase tissue inhibitor 2; TIMP-3: metalloproteinase tissue inhibitor 3; TIMP-4: metalloproteinase tissue inhibitor 4; SFD: Sorsby's Fundus Dystrophy; POAG: primary open angle glaucoma.
